# Supplementary material for: Bioactive amines in non-conventional edible plants from Brazil: health benefits and concerns
Source: Research Square preprint supplement (doi:10.21203/rs.3.rs-4571120/v1), 2024-07-15
Supplement: Supplementary file 1 [file 88c13e62124998ab73fd4f1c.docx]

List of Tables

Table 1. Characterization of conventional and non-conventional fruits and vegetables included in this study.

Table 2. Equation of the linear regression and correlation coefficient of the standard curves for each bioactive amine and respective quantification limits.

Table 3. Content of bioactive amines in *siriguela*, *marolo*, custard apple, acerola, *jabuticaba*, starfruit, *ora-pro-nobis*, kale, purple chicory, and *serralha*.

Table 1.

| **Fruit and vegetable** | **Conventional or non-conventional** | **Part used** | **Family** | **Species** | **Picture** |
| --- | --- | --- | --- | --- | --- |
| *Seriguela* (Purple mombin) | Non-conventional | Fruit, pulp and peel, without seeds | Anacardiaceae | *Spondias purpurea* L. | *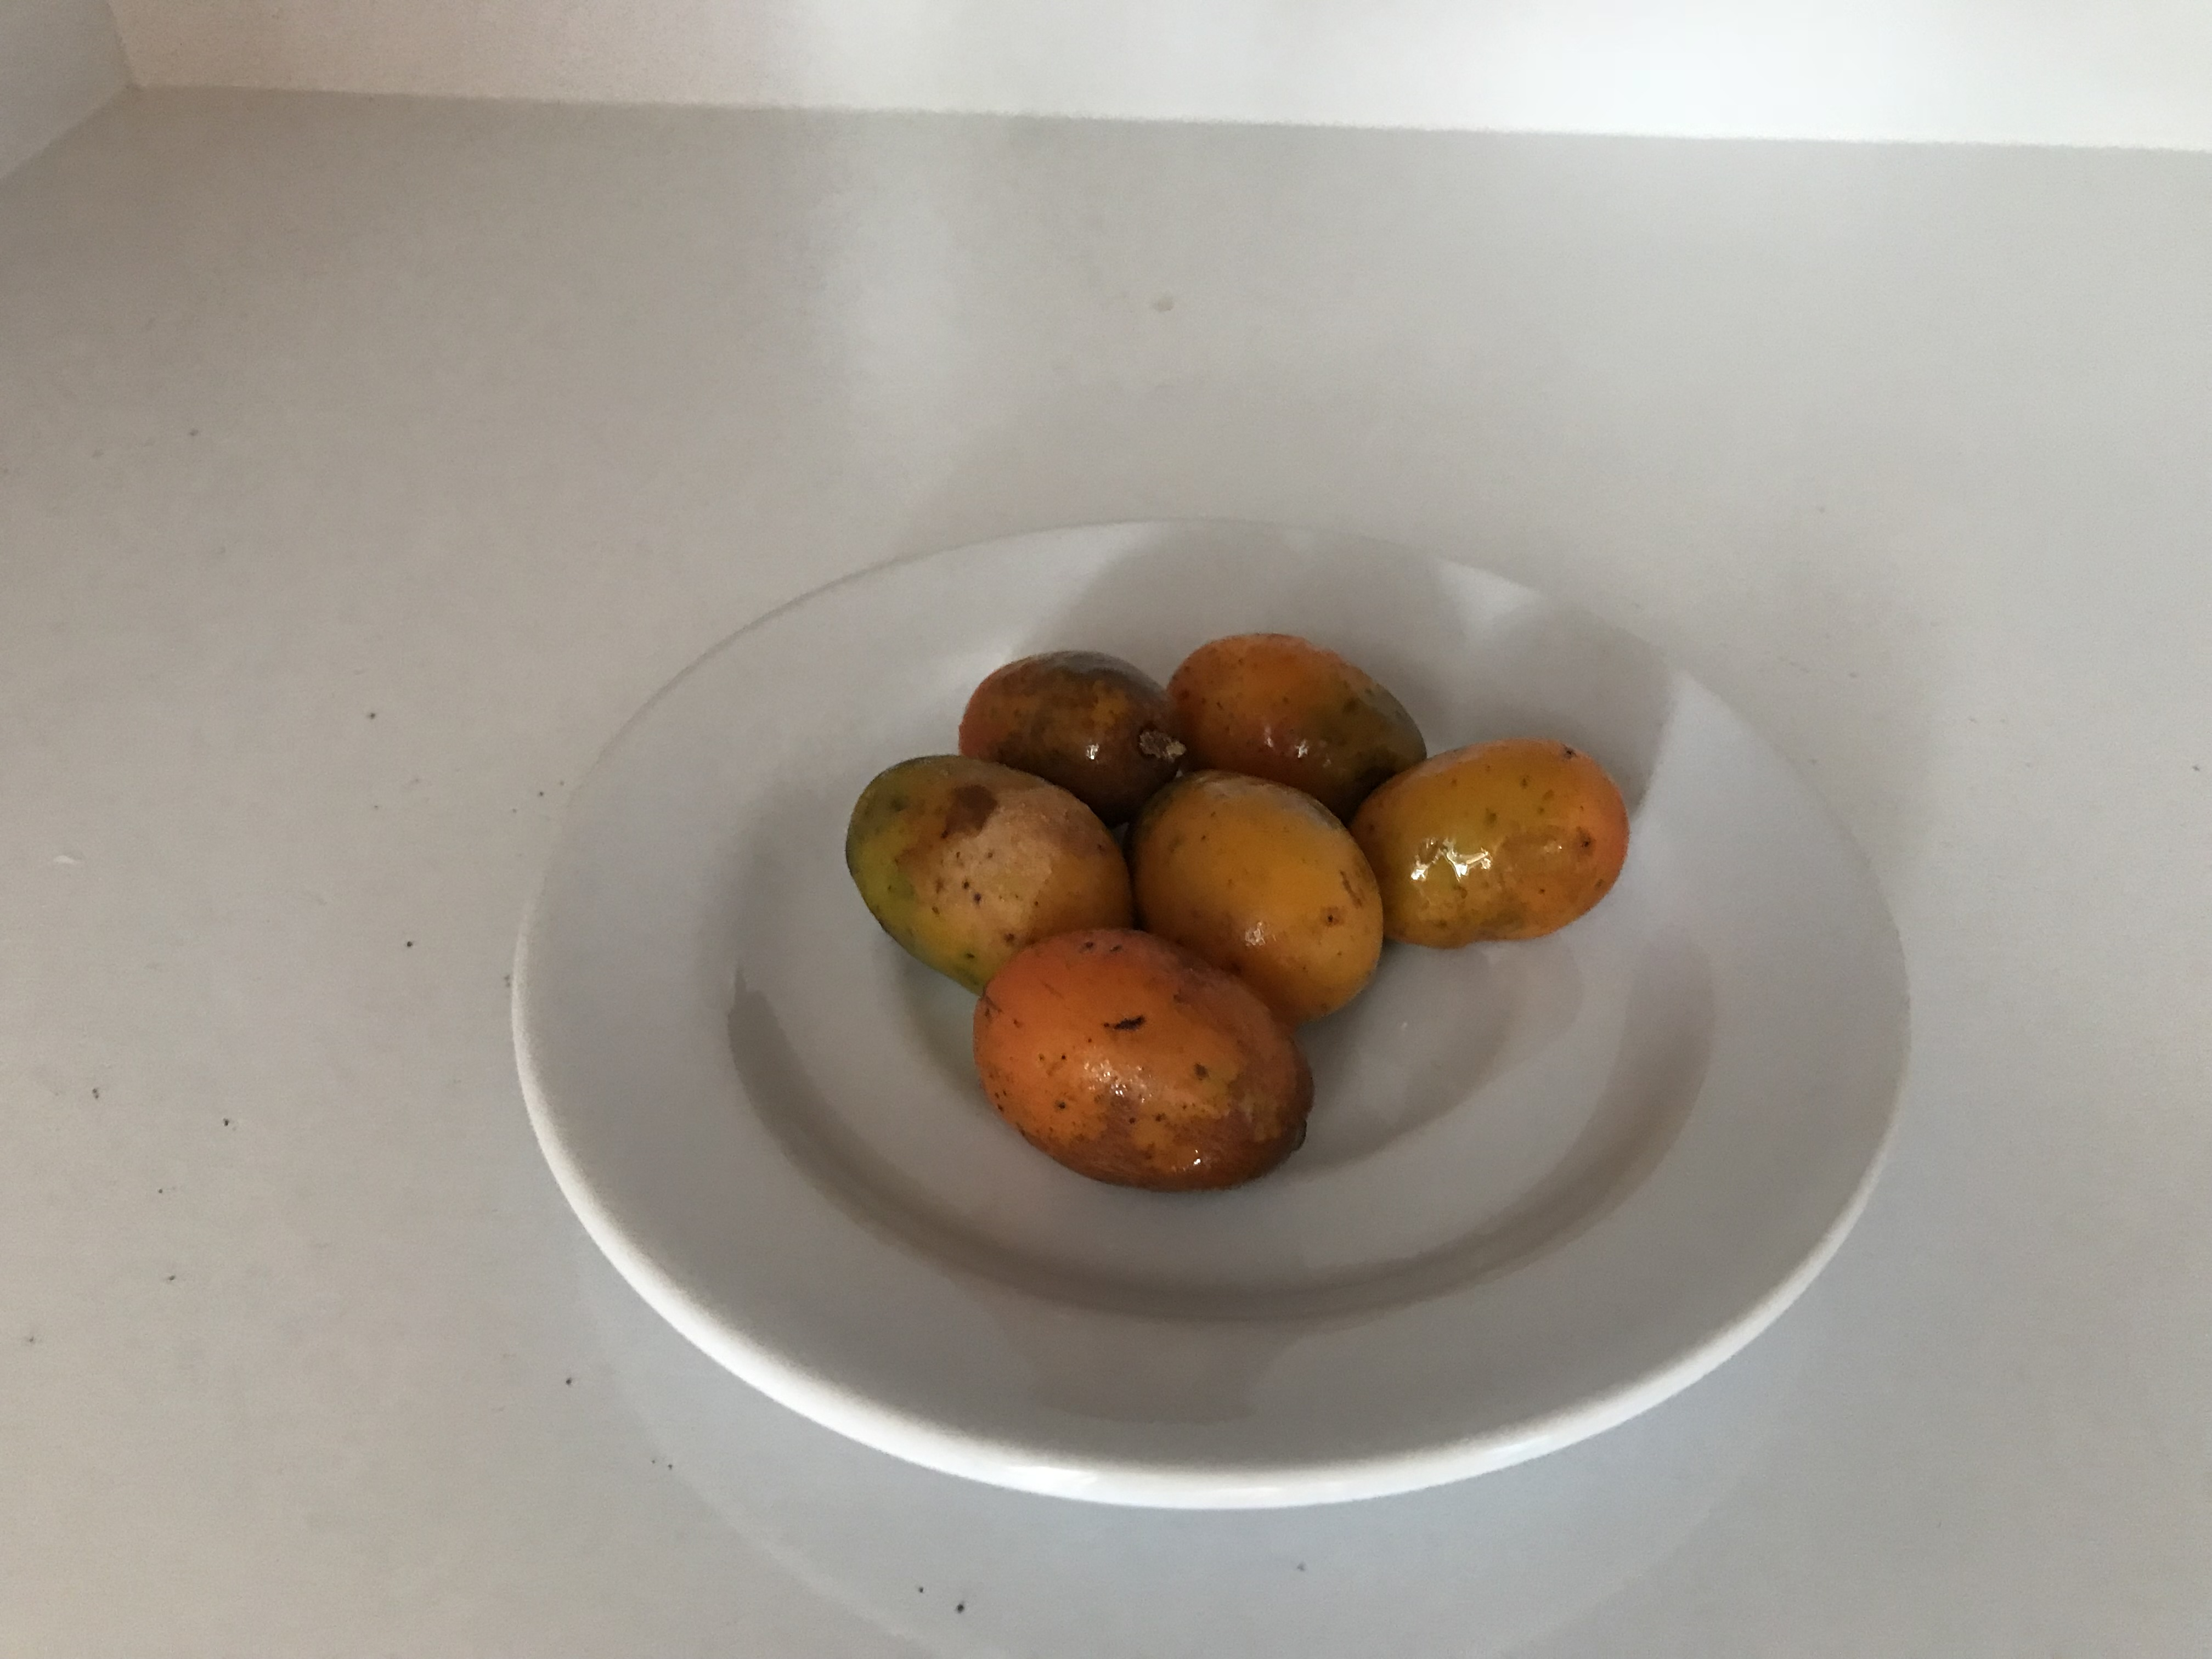* |
| *Marolo* | Non-conventional | Fruit, pulp, without seeds | Annonaceae | *Annona crassiflora* Mart. | *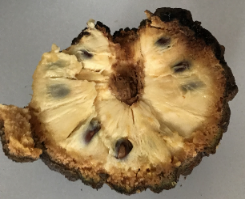* |
| Custard apple (Sweet sop) | Non-conventional | Fruit, pulp, without seeds | Annonaceae | *Annona squamosa* | 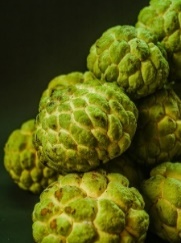 |
| *Acerola* (Barbados cherry) | Conventional | Fruit, pulp and peel, without seeds | Malpighiaceae | *Malpighia glabra* L. | *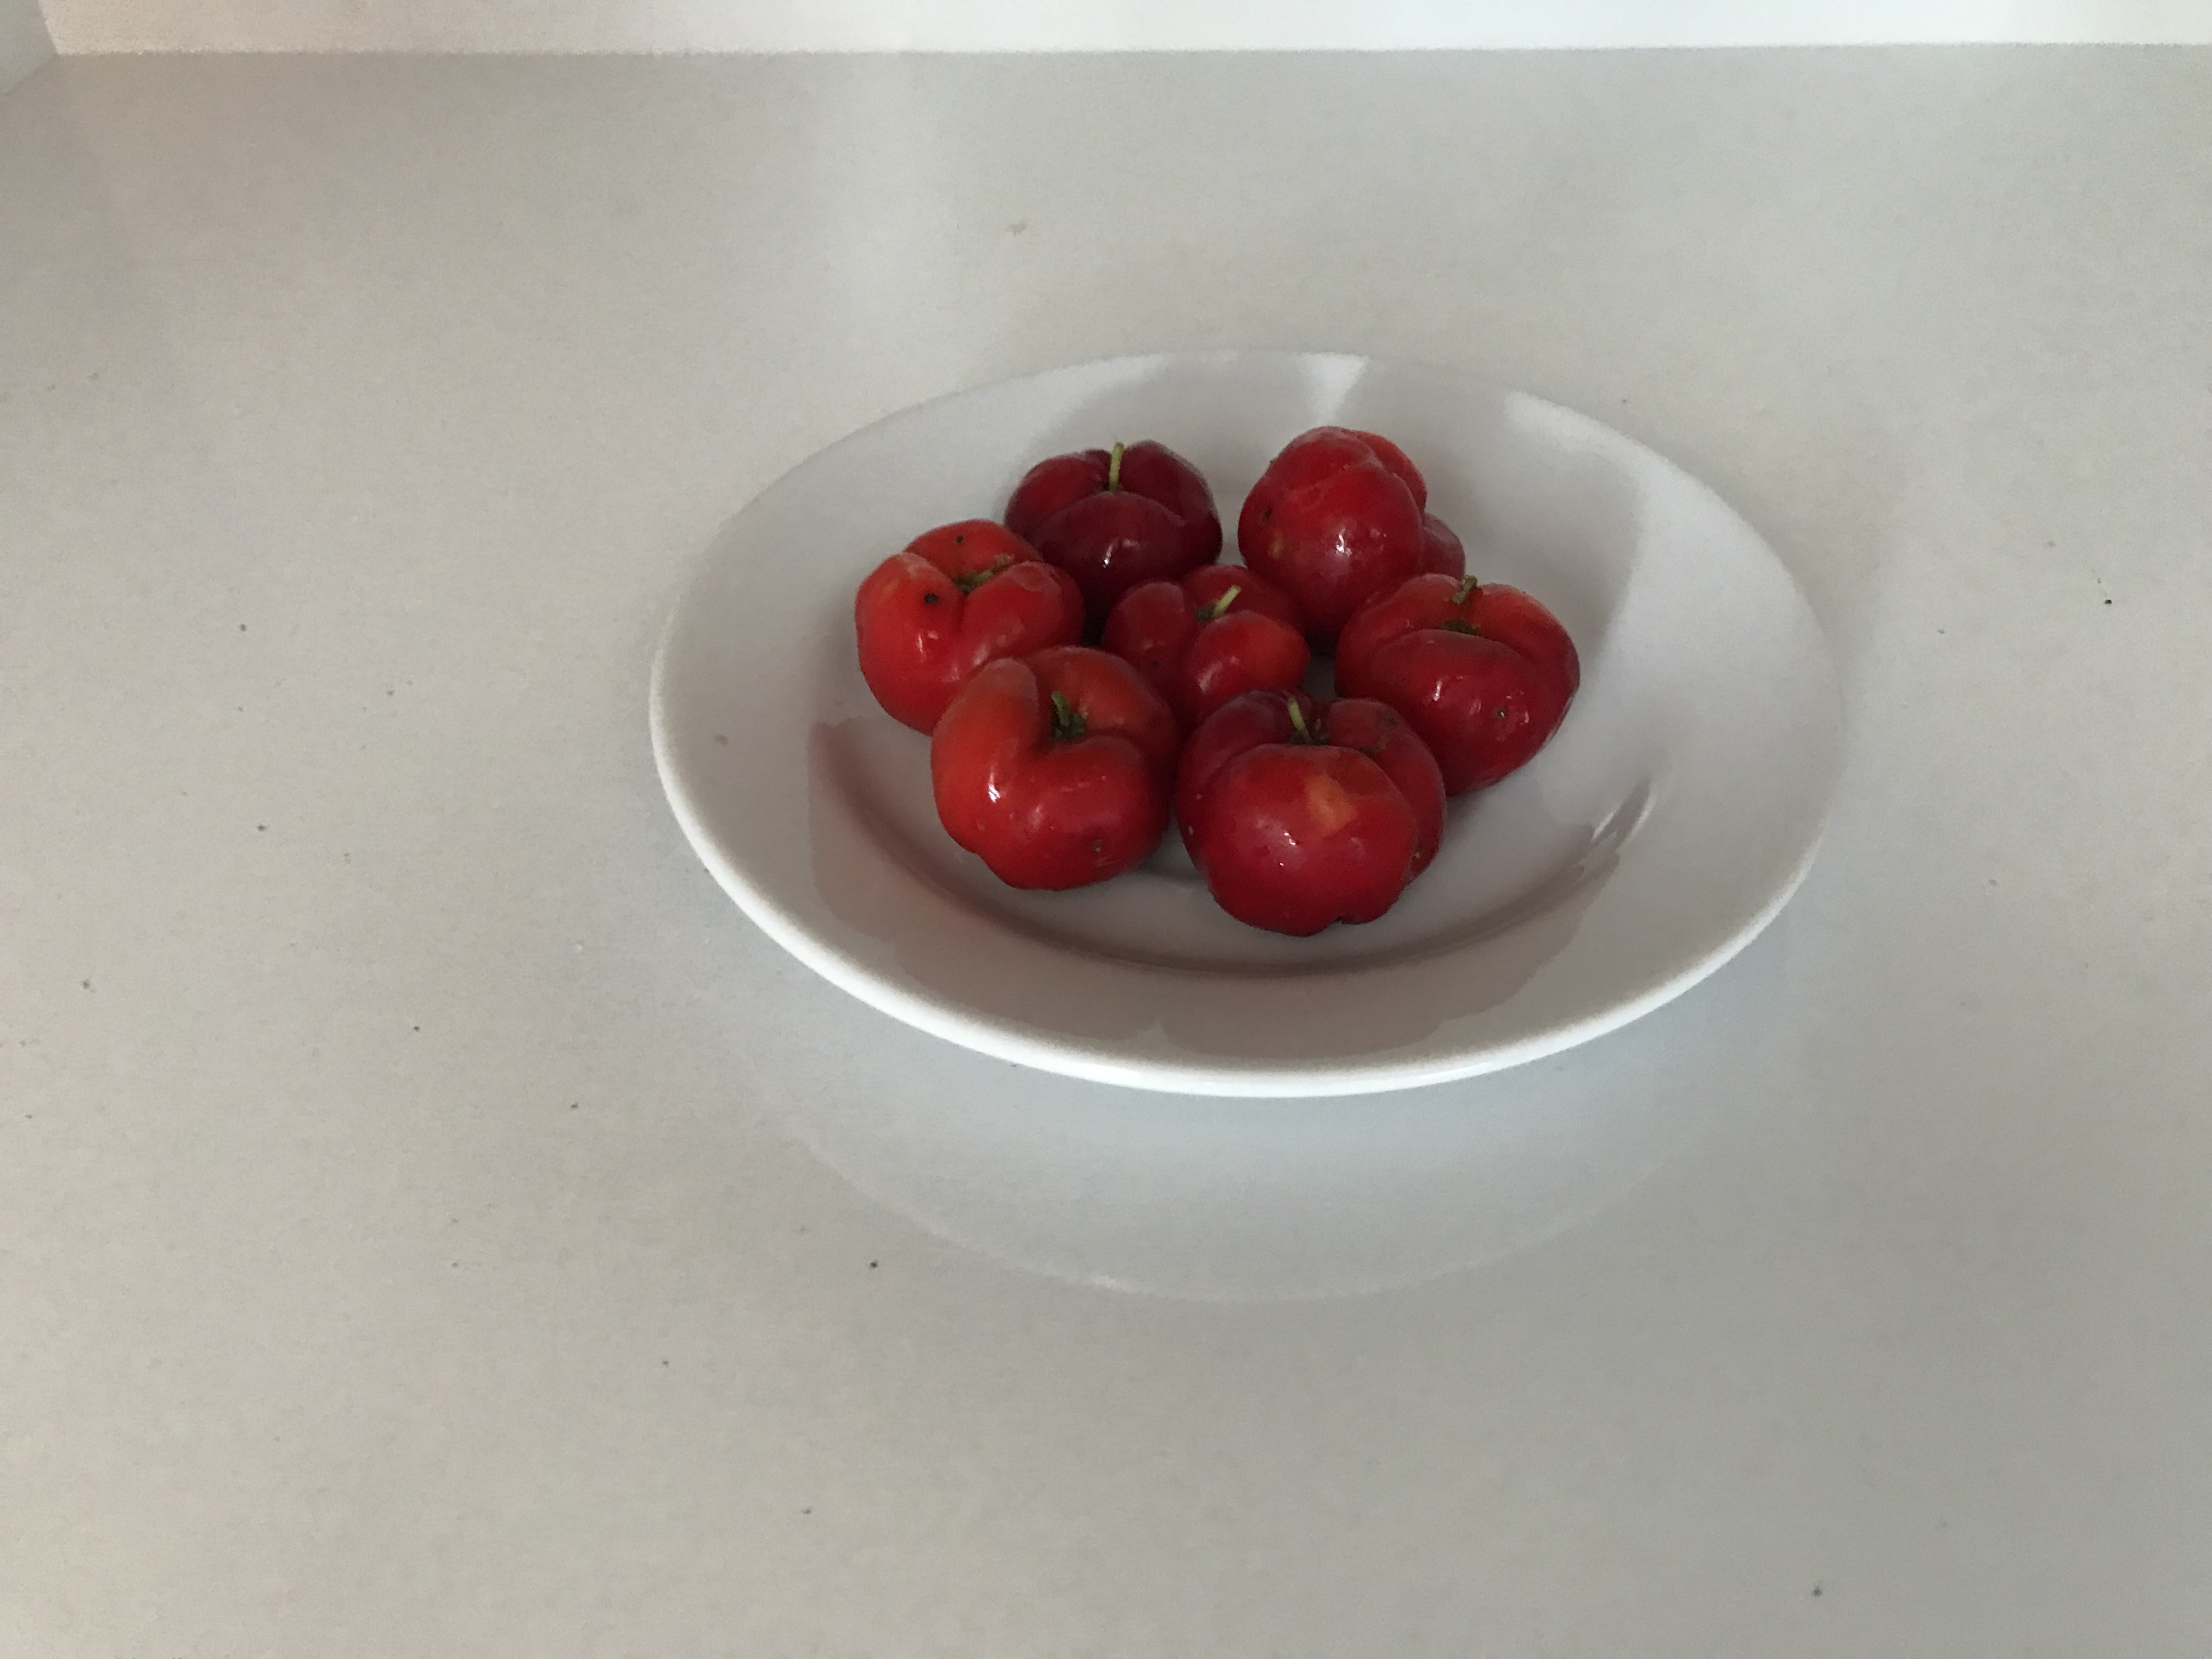* |
| *Jabuticaba* | Non-conventional | Fruit, pulp, without seeds | Myrtacea | *Plinia cauliflora* | 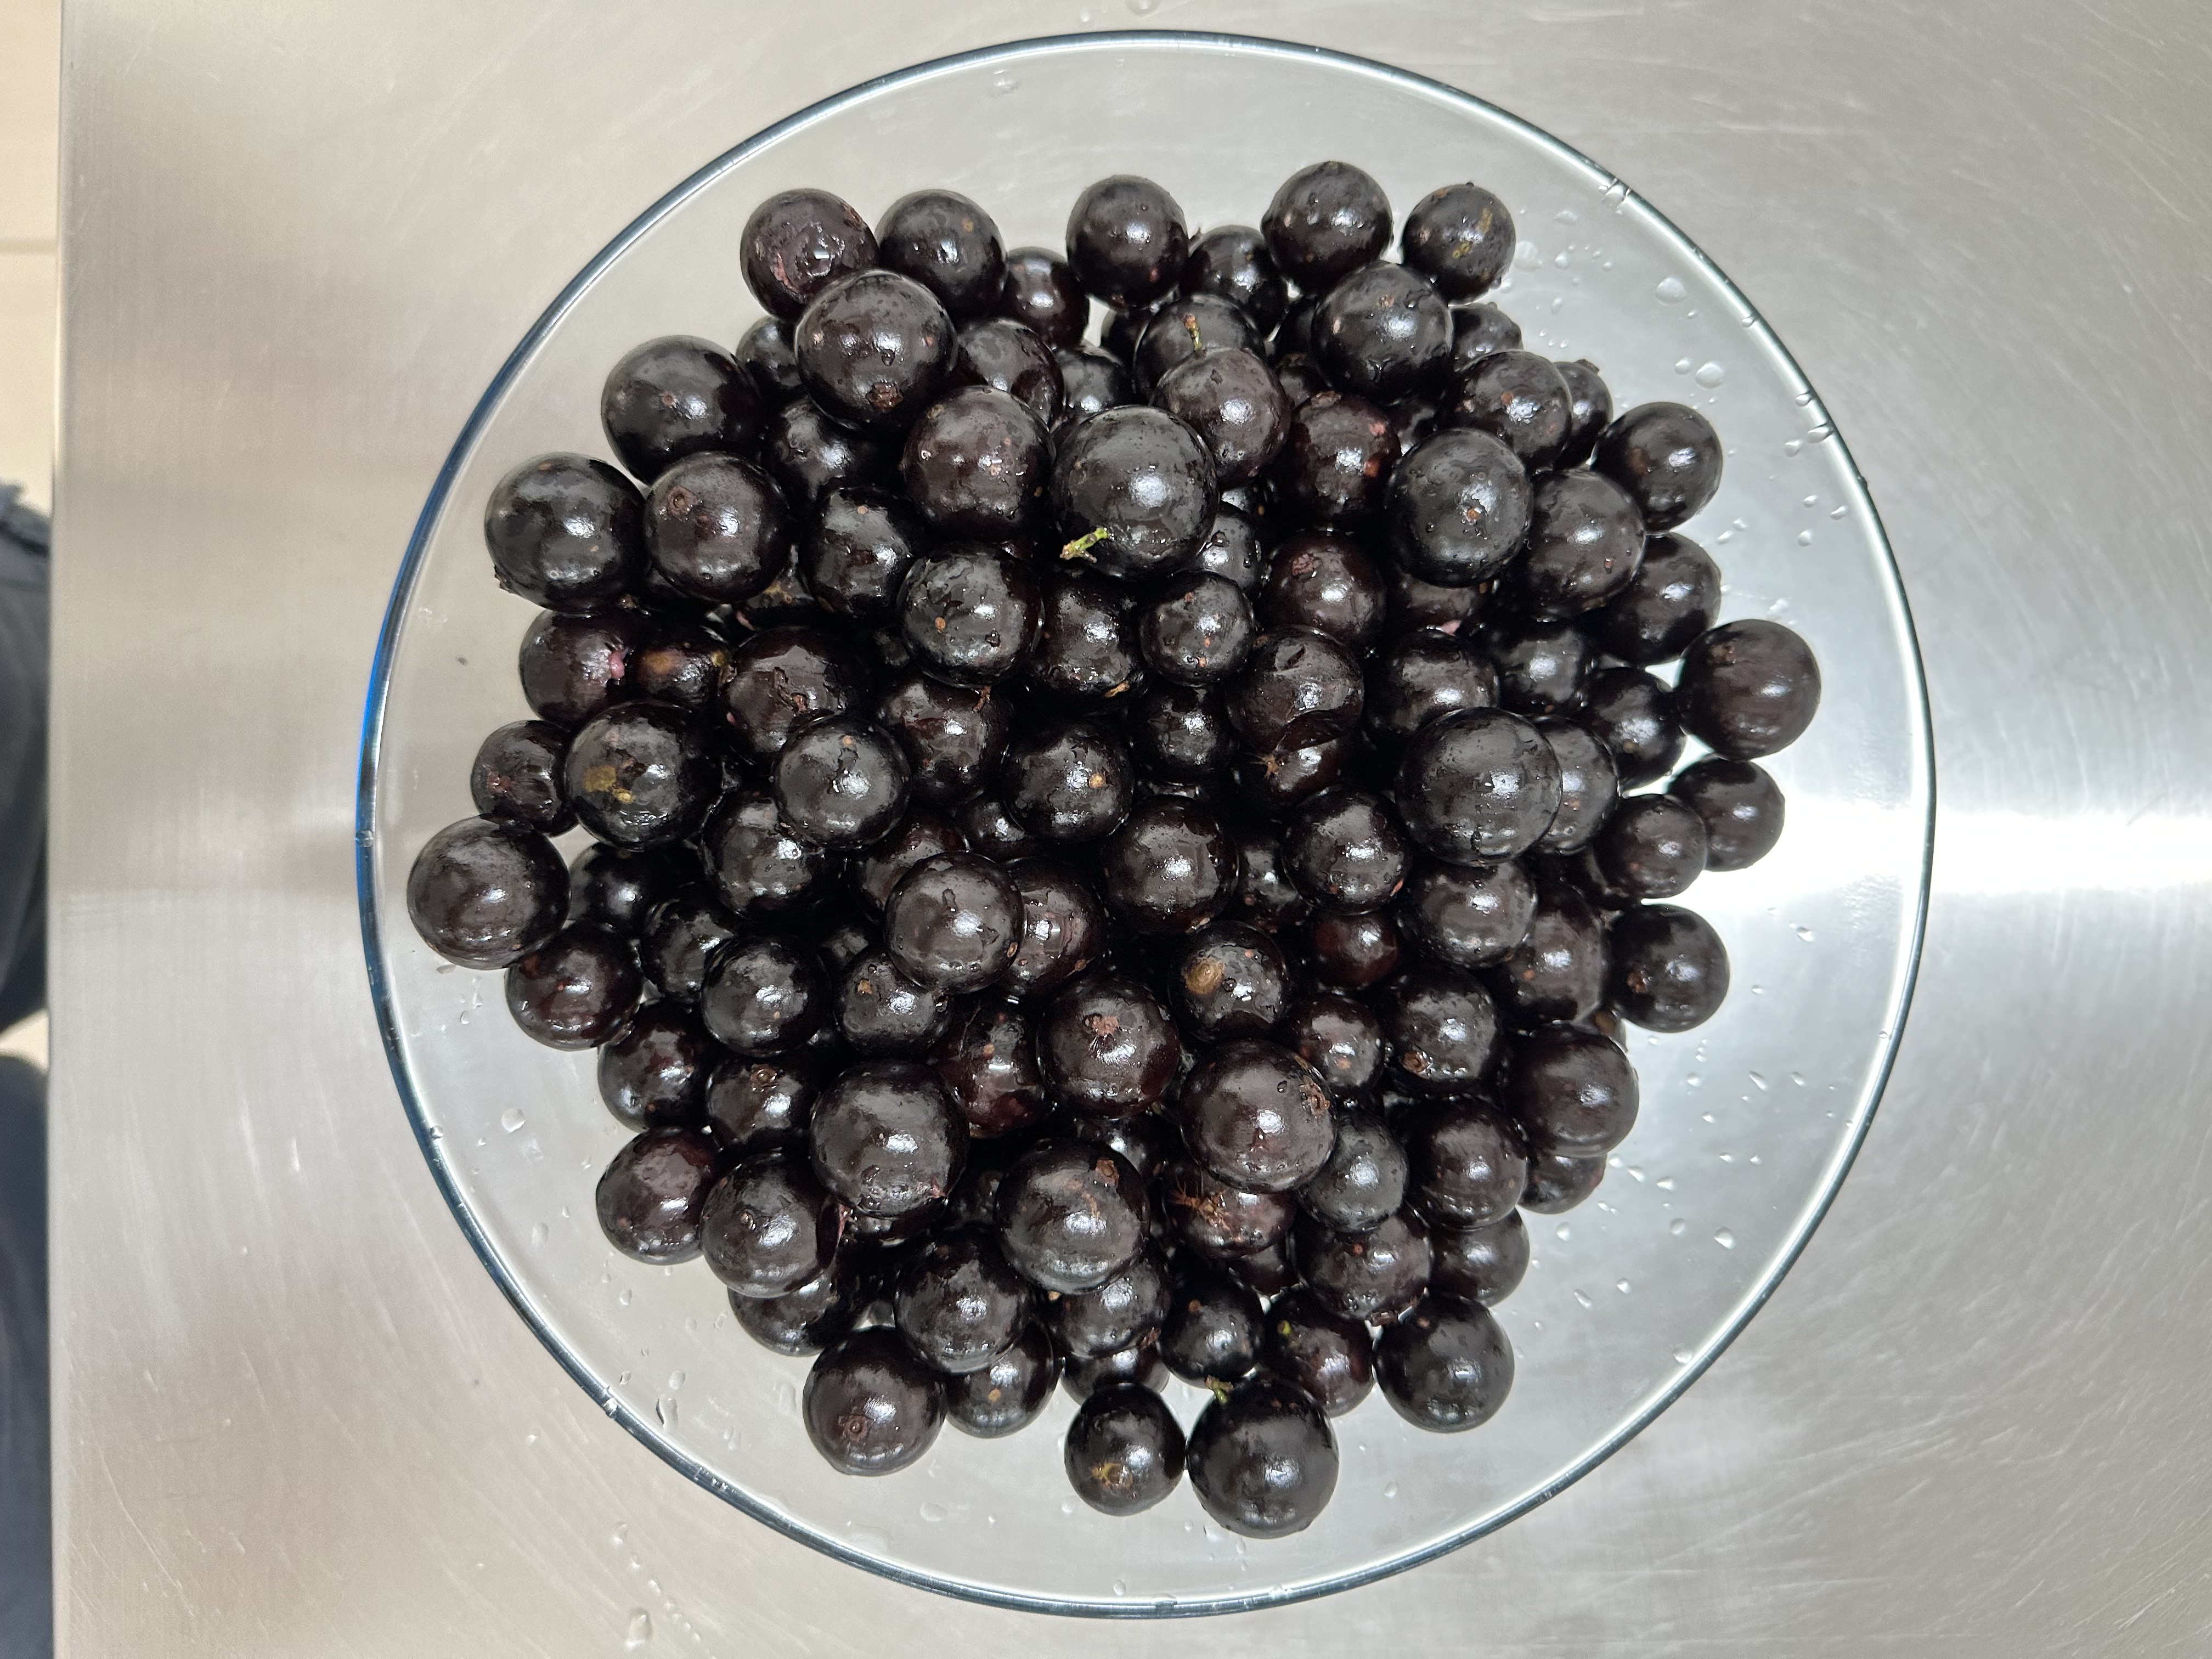 |
| Starfruit(*Carambola*) | Conventional | Fruit, pulp, without seeds | Oxalidaceae | *Averrhoa carambola* L. | *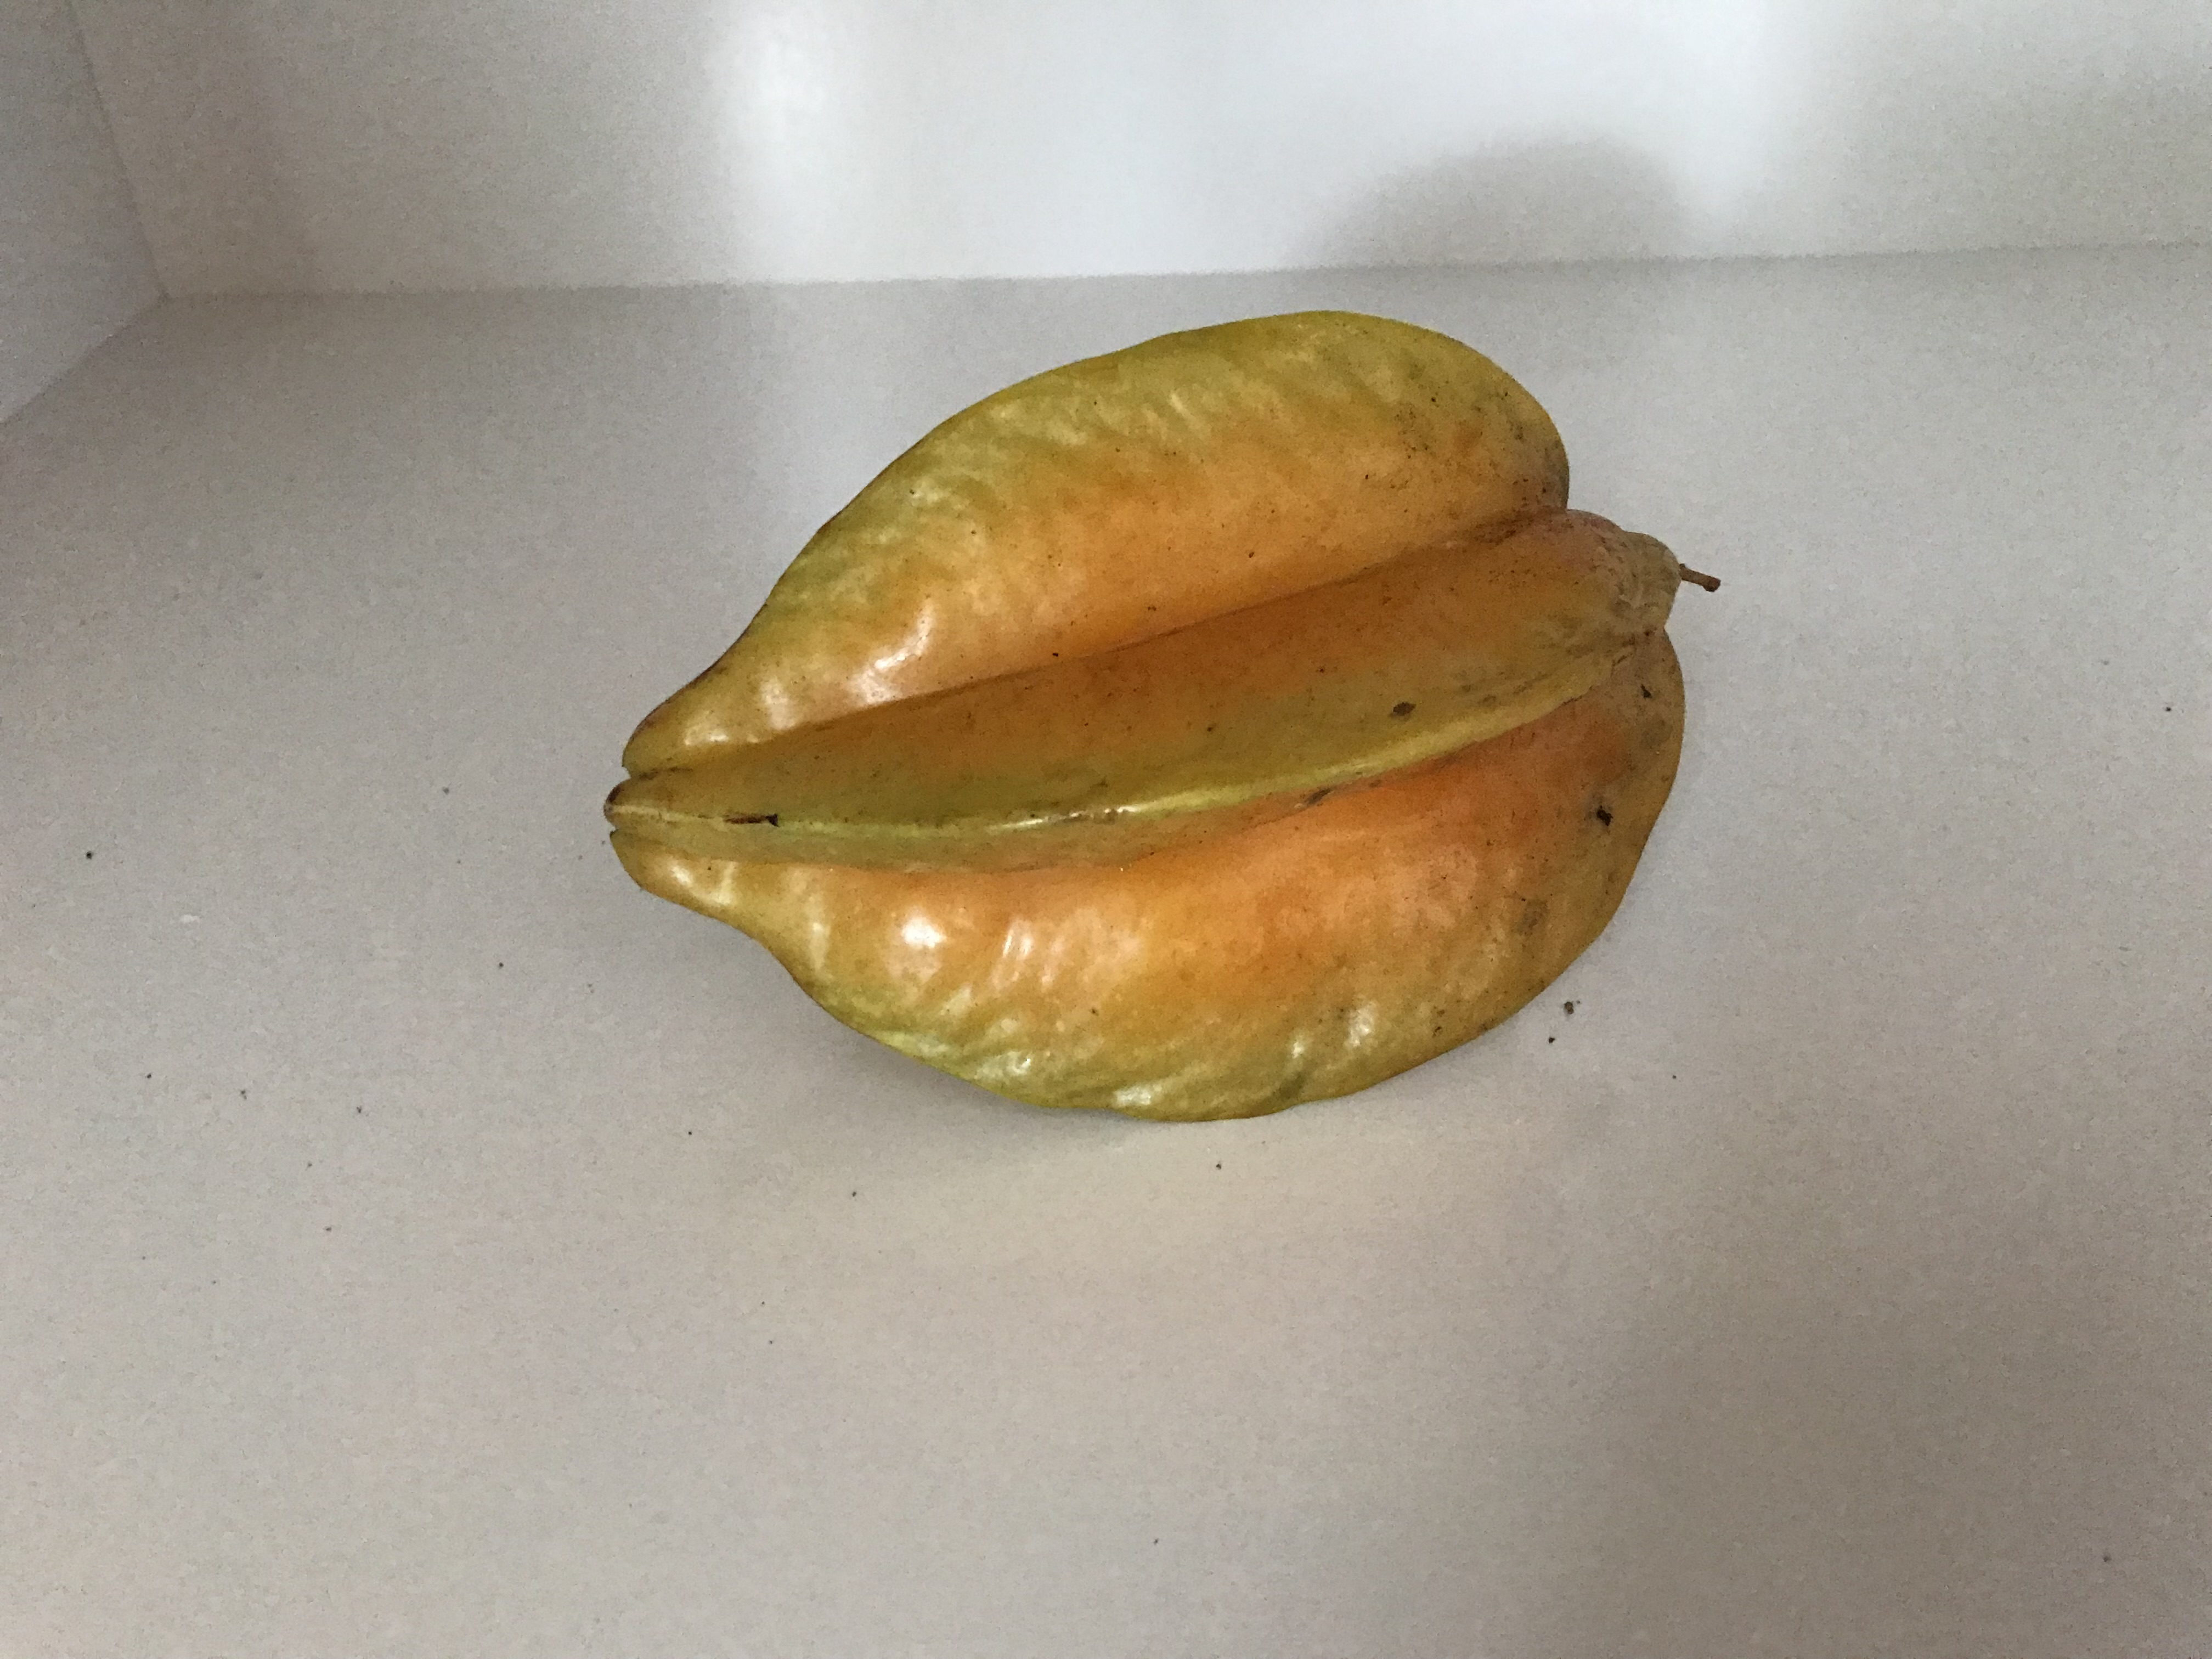* |
| Kale | Conventional | Leaves | Brassicaceae | *Brassica oleracea* L. | 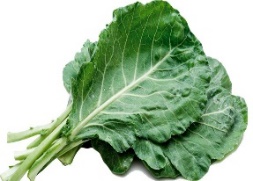 |
| *Ora-pro-nobis* (Barbados shrub) | Non-conventional | Leaves | Cactaceae | *Pereskia aculeata* Mill. | *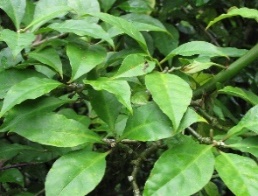* |
| *Almeirão roxo* (Wild lettuce) | Non-conventional | Leaves | Asteraceae | *Lactuca canadensis* L. | 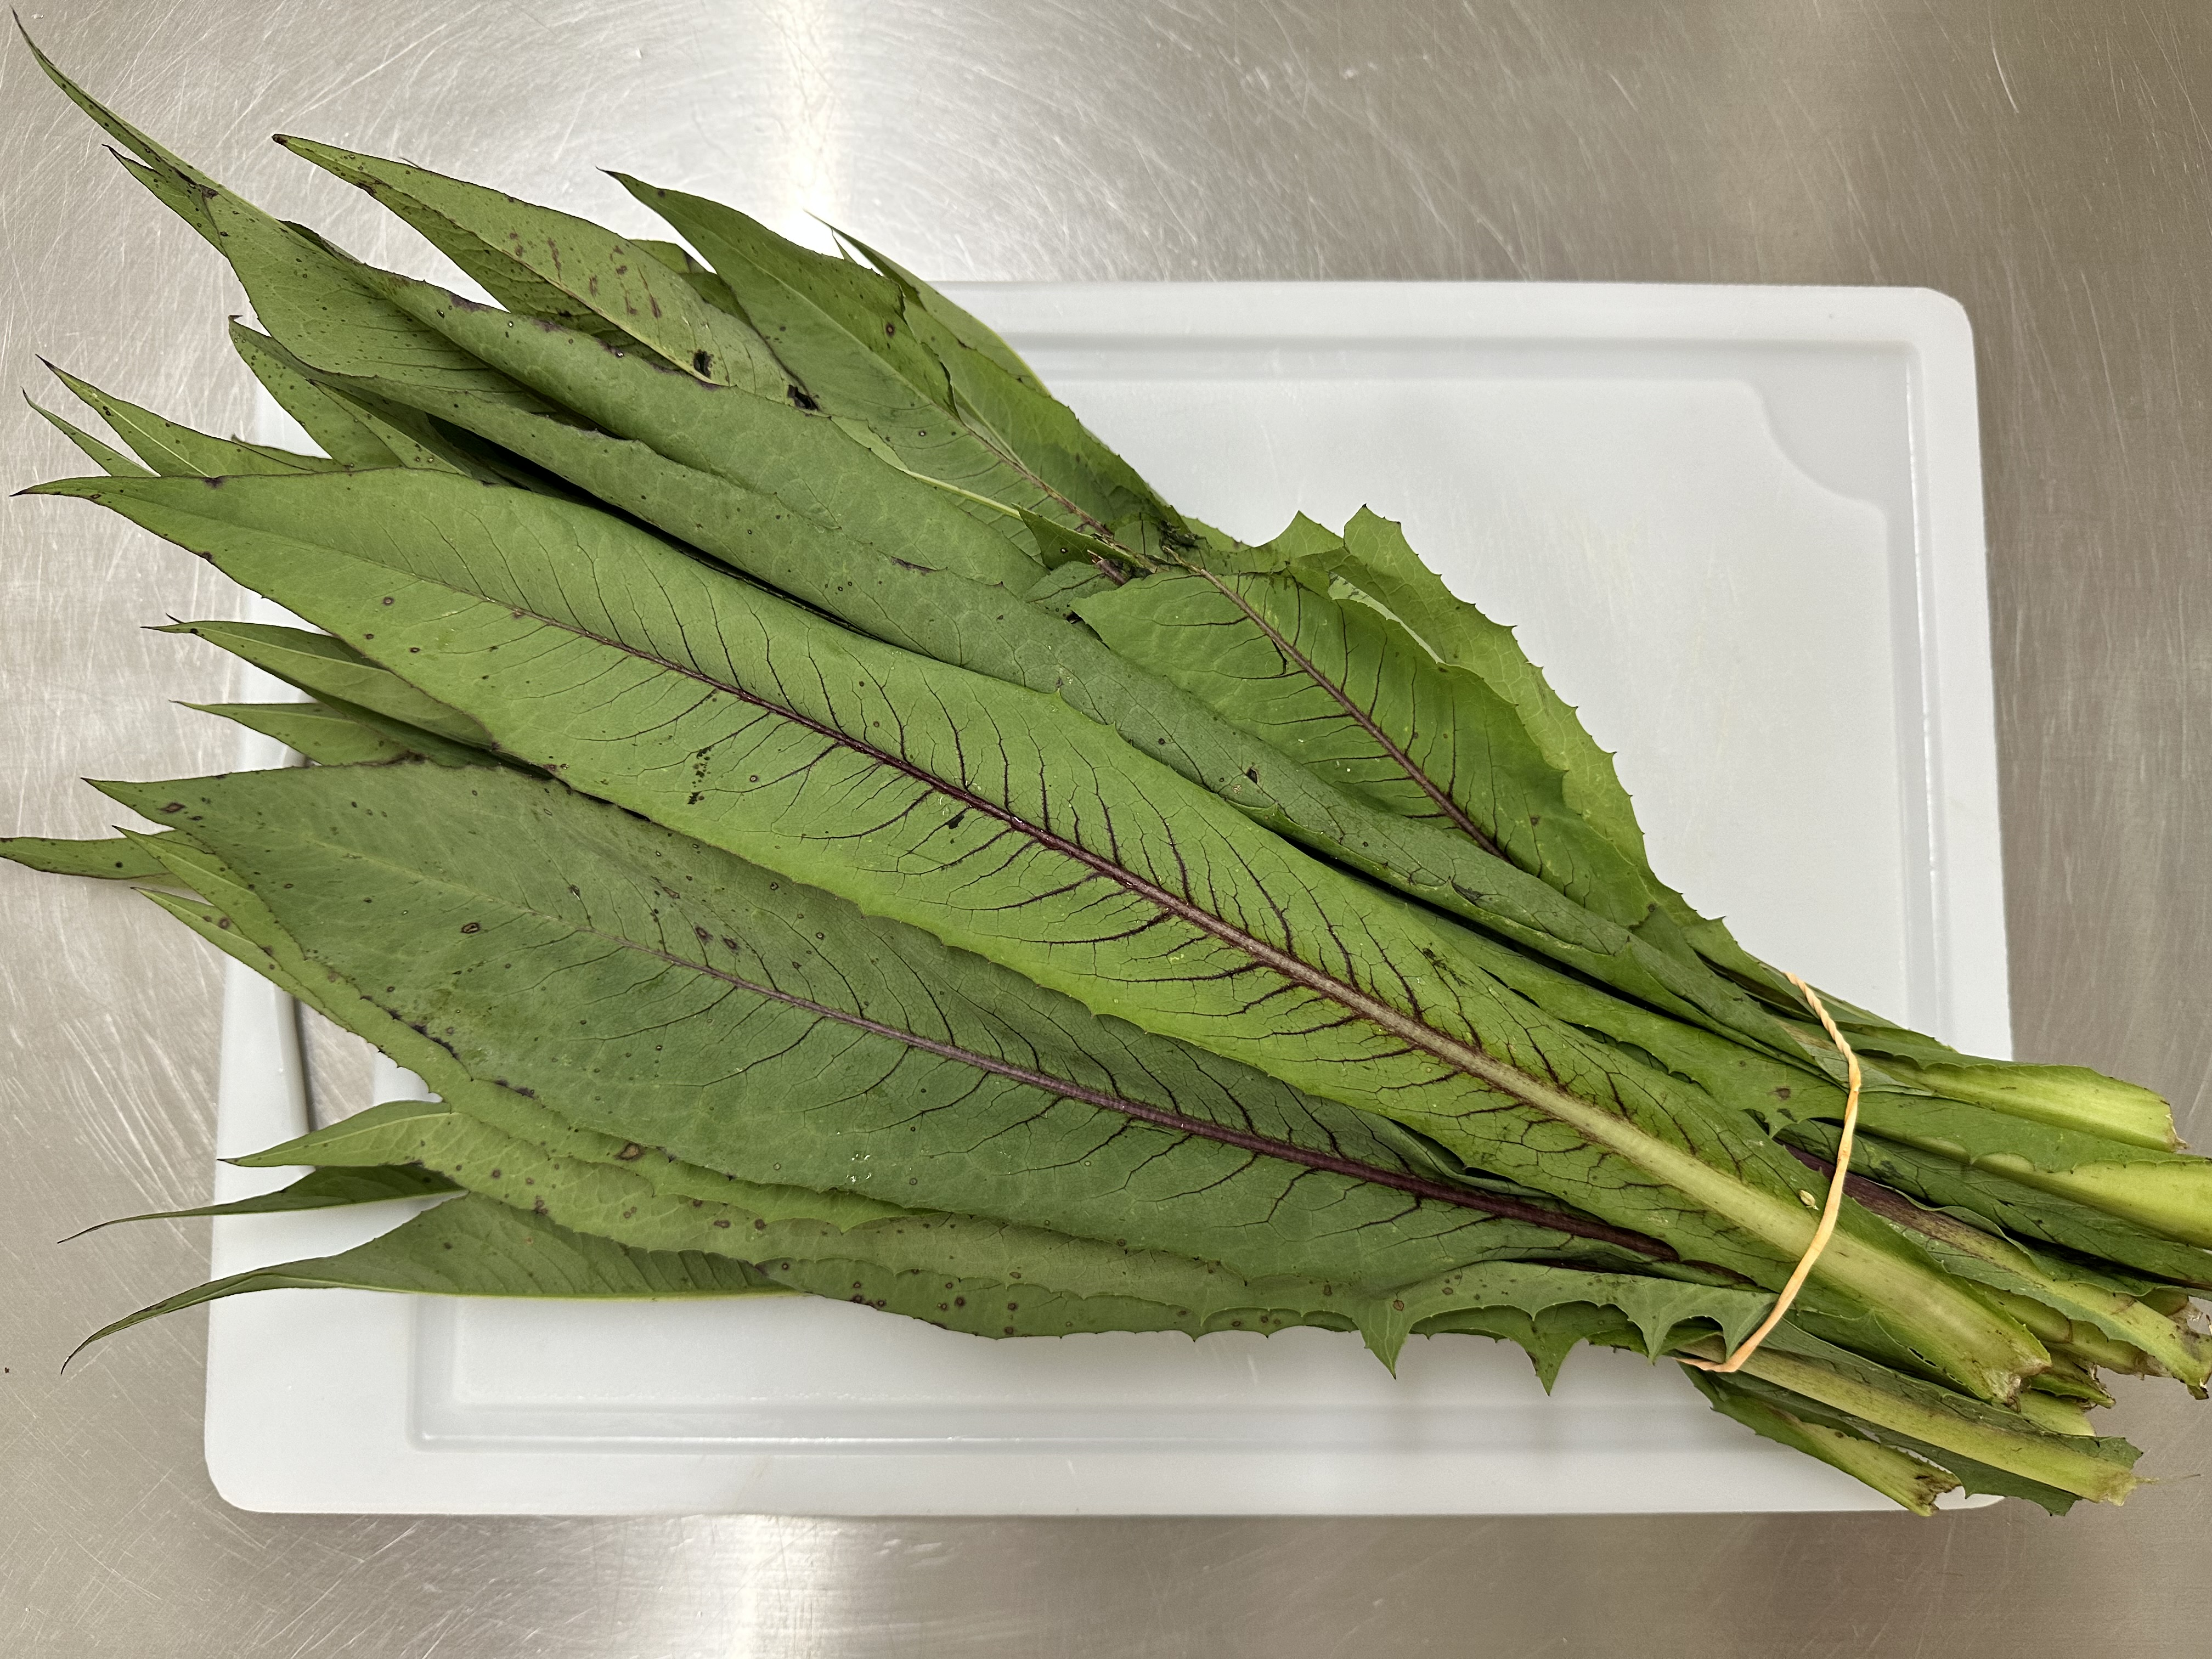 |
| *Serralha* (common sow-thistle) | Non-conventional | Leaves | Asteraceae | *Sonchus oleraceus* L. | *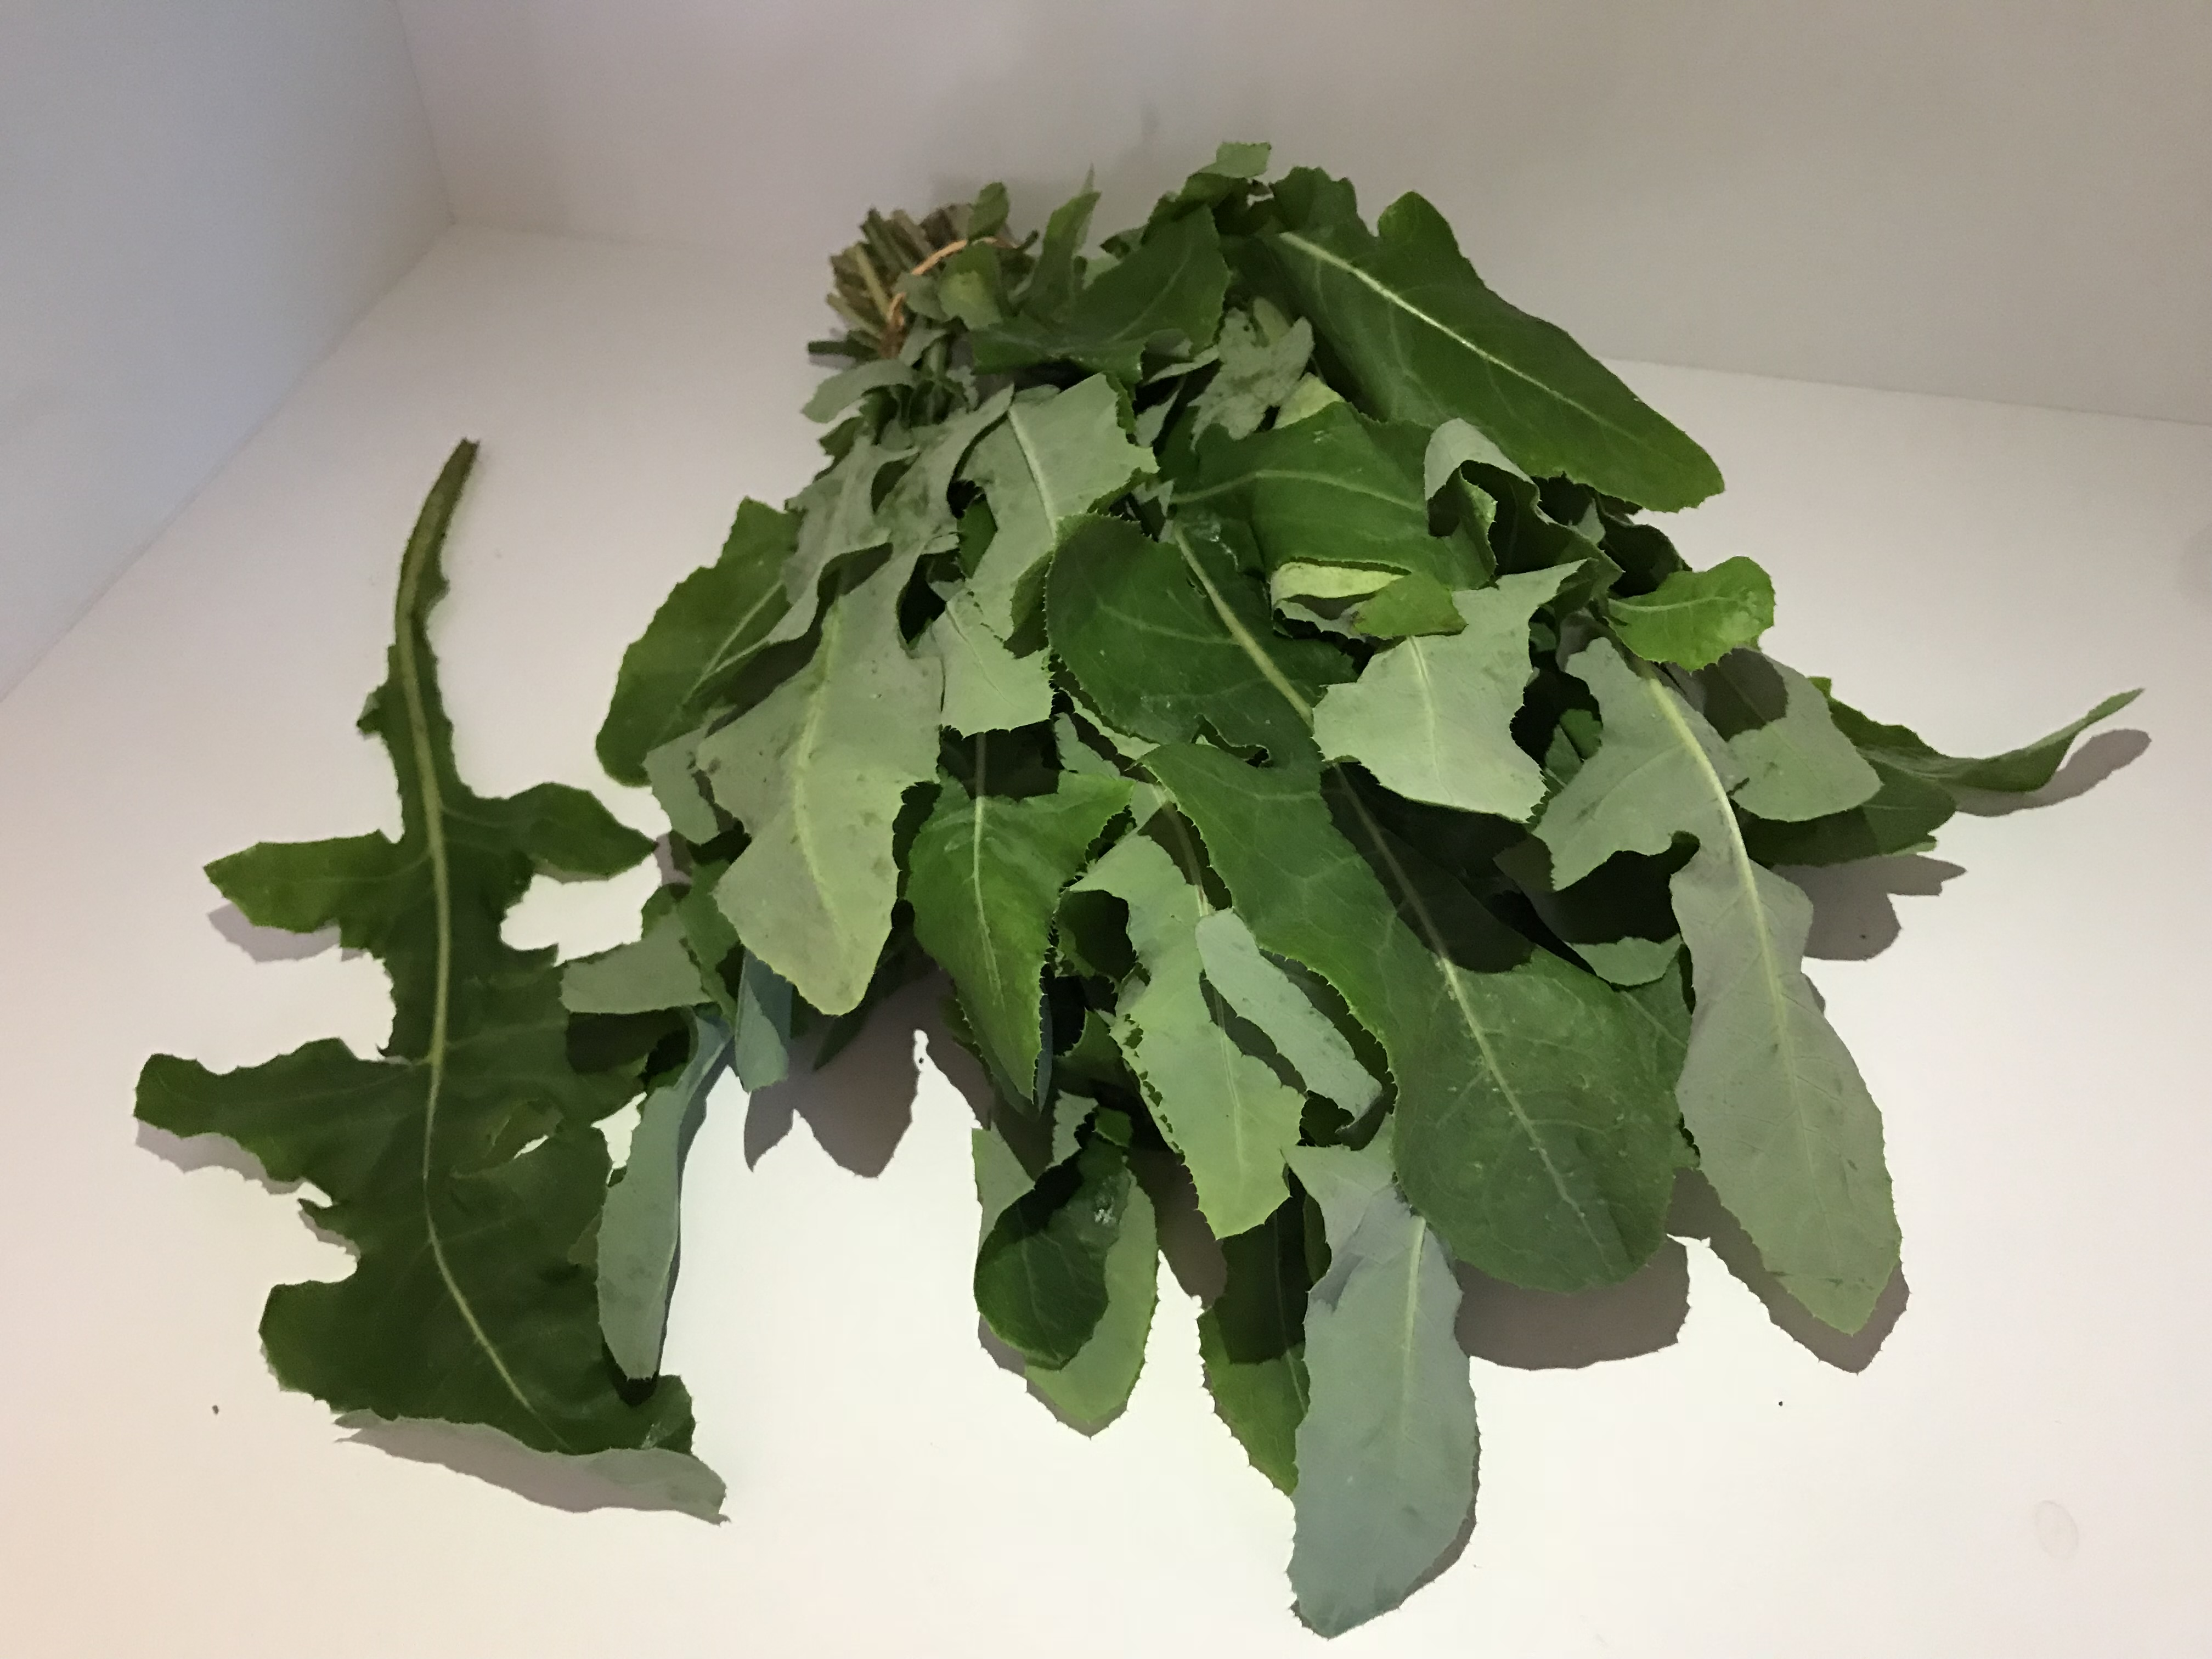* |

Table 2.

| **Bioactive amines** | **Standard curve** | | **LOD (mg/kg)** | **Quantification limit (mg/kg)** |
| --- | --- | --- | --- | --- |
| **Linear equation** | **r2** |
| Spermidine | Y1 = 188750x + 24983 | 0.998 | 0.03 | 0.08 |
| Agmatine | Y = 158549x + 18397 | 0.998 | 0.05 | 0.16 |
| Putrescine | Y = 398444x – 38161 | 0.998 | 0.03 | 0.08 |
| Cadaverine | Y = 399508x + 3071.6 | 0.998 | 0.03 | 0.08 |
| Histamine | Y = 206823x + 18297 | 0.997 | 0.03 | 0.08 |
| Tyramine | Y = 154797x – 29613 | 0.999 | 0.05 | 0.14 |
| Serotonin | Y = 86096x + 18720 | 0.993 | 0.05 | 0.16 |
| 2-Phenylethylamine | Y = 223190x + 40708 | 0.996 | 0.03 | 0.08 |
| Tryptamine | Y = 131653x + 38436 | 0.994 | 0.05 | 0.14 |

1Y = area; x = concentration; r2 = correlation coefficient. LOD: limit of detection

Table 3.

| **Product** | **Bioactive amines (mg/kg)1** | | | | | | | | |
| --- | --- | --- | --- | --- | --- | --- | --- | --- | --- |
|  | **SPD*** | **AGM*** | **PUT*** | **CAD*** | **HIM**** | **TYM*** | **PHM**** | **SRT**** | **Total*** |
| **Fruit** |  |  |  |  |  |  |  |  |  |
| Seriguela (Min-max)  Average (SD)  Median | 13.26-13.54  13.41 (0.14)  13.42a | nda | 3.27-3.34  3.30 (0.04)  3.30bc | nda | ndb | 40.88-42.29  41.56 (0.71)  41.52a | 0.55-0.56  0.56a (0.01)  0.56 | ndb | 58.25-59.45  58.83 (0.60)  58.79ab |
| Marolo (Min-max)  Average (SD)  Median | 8.79-11.13  9.92 (1.18)  9.85ab | nda | 12.31-16.72  14.60 (2.21)  14.78ab | nda | ndb | 18.25-25.47  22.10 (3.63)  22.57a | 0.23-0.39  0.28b (0.09)  0.23 | ndb | 43.88-50.33  46.90 (3.2)  46.49ab |
| Custard apple (Min-max)  Average (SD)  Median | 5-76-8.57  7.31 (1.43)  7.61ab | nda | 14.74-17.32  15.78 (1.36)  15.29ab | nda | ndb | nda | nde | ndb | 20.50-25.89  23.10 (2.7)  22.90bc |
| Acerola *(*Min-max)  Average (SD)  Median | 5.13-5.48  5.31 (0.18)  5.32ab | 0.23-0.24  0.23 (0.01)  0.23a | 10.71-11.27  10.98 (0.28)  10.96bc | nd-0.57  0.28 (0.29)  0.26a | ndb | nda | 0.24-0.27  0.25bc (0.02)  0.24 | ndb | 16.67-17.44  17.05 (0.39)  17.04bc |
| Jabuticaba (Min-max)  Average (SD)  Median | 7.05-10.98  8.87 (1.98)  8.58ab | nda | 2.06-2.98  2.53 (0.46)  2.55bc | nda | ndb | nda | ndd | ndb | 9.11-13.96  11.40 (2.44)  11.13bc |
| Starfruit (Min-max)  Average (SD)  Median | 2.49-2.81  2.64 (0.16)  2.63ab | 0.20-0.22  0.21 (0.01)  0.21a | 2.32-2.85  2.57 (0.27)  2.56bc | nd-0.32  0.15 (0.16)  0.14a | ndb | nda | 0.22-0.24  0.23bc (0.01)  0.23 | 0.94-1.07  1.01a (0.07)  1.00 | 6.17-7.51  6.82 (0.39)  6.77bc |
| **Vegetable** |  |  |  |  |  |  |  |  |  |
| Kale (Min-max)  Average (SD)  Median | 8.84-9.10  8.97 (0.13)  8.96ab | nda | 0.65-0.67  0.66 (0.01)  0.66c | nda | ndb | nda | ndd | ndb | 9.51-9.75  9.63 (0.12)  9.62bc |
| Ora-pro-nobis (Min-max)  Average (SD)  Median | 1.55-1.96  1.74 (0.24)  1.70ab | nda | 3.87-4.43  4.10 (0.29)  4.00bc | 0.89-1.00  0.94 (0.06)  0.94a | 1.08-1.44  1.25a (0.18)  1.23 | 0.52-0.91  0.77 (0.21)  0.87a | ndd | ndb | 8.20-9.74  8.80 (0.82)  8.46bc |
| Almeirão roxo (Min-max)  Average (SD)  Median | 1.48-1.85  1.66 (0.19)  1.65ab | nda | 1.66-1.77  1.71 (0.06)  1.71bc | 0.25-0.32  0.28 (0.04)  0.28a | ndb | nda | 0.15-0.16  0.16c (0.01)  0.16 | ndb | 3.54-4.10  3.81 (0.28)  3.79c |
| Serralha (Min-max)  Average (SD)  Median | 1.17-1.44  1.31 (0.14)  1.32b | 0.20-0.22  0.21 (0.01)  0.22a | 1.28-1.37  1.32 (0.05)  1.33bc | 0.14-0.32  0.23 (0.09)  0.22a | ndb | nda | 0.16-0.17  0.17c (0.01)  0.17 | ndb | 3.14-3.34  3.24 (0.10)  3.25c |

1 n = 3 lots, randomly gathered at an open-air market in Alfenas, MG, Brazil; SD-standard deviation; Min-minimum; Max-maximum; SPD-spermidine; AGM-agmatine; PUT-putrescine; CAD-cadaverine; HIM-histamine; TYM-tyramine; PHM-2-phenylethylamine; SRT-serotonin. nd-not detected (quantification limit in mg/kg: SPD, PUT, CAD, HIM, PHM < 0.08; TYM, TRM < 0.14 and, AGM, SRT < 0.16). Values followed by the same letter in the same column are not significantly different (*Kruskal-Wallis’ test followed by Dunn’s multiple comparison test; **ANOVA followed by Tukey’s Test, p ≤ 0.05).
